# Supplementary material for: Biochar as an electron shuttle for reductive dechlorination of pentachlorophenol by Geobacter sulfurreducens
Source: PubMed Central journal article supplement (PMC4655402; doi:10.1038/srep16221), 2015-11-23
Supplement: srep16221-s1.pdf [file srep16221-s1.pdf]

## Supplementary information

### Biochar as an electron shuttle for reductive dechlorination of pentachlorophenol by *Geobacter sulfurreducens*

Linpeng Yu<sup>1,2,3,\*</sup>, Yong Yuan<sup>3,4,\*</sup>, Jia Tang<sup>3,4</sup>, Yueqiang Wang<sup>3,4</sup> & Shungui Zhou<sup>3,4</sup>

<sup>1</sup>Guangzhou Institute of Geochemistry, Chinese Academy of Sciences, Guangzhou 510640, China

<sup>2</sup>Graduate University of Chinese Academy of Sciences, Beijing 100039, China

<sup>3</sup>Guangdong Institute of Eco-environmental and Soil Sciences, Guangzhou, 510640, China

<sup>4</sup>Guangdong Key Laboratory of Agricultural Environment Management, Guangzhou, 510640, China

Corresponding author: Shungui Zhou

Email: sgzhou@soil.gd.cn (S. Zhou)

Tel: +86-20-87025872, Fax: +86-20-87025872

\*These authors contributed equally to this work.

Linpeng Yu & Yong Yuan

- 15 Pages
- 2 Table
- 8 Figures

36 **List of Contents**

37 **Table S1.** Physicochemical characteristics of biochars used in the present study.

38 **Table S2.** The fitted parameters of PCP biodegradation in the presence of different biochars.

39 **Fig. S1** Mediated electrochemical reduction (a, MER) and oxidization (b, MEO) of different  
40 biochars by the graphite electrode at applied potentials.

41 **Fig. S2** Fourier Transform Infrared Spectrum of (a) six different biochars, (b) BC400 and  
42 BC400 modified by hydroquinone (MBC400), (c) BC900 and H<sub>2</sub>O<sub>2</sub>-treated BC900  
43 (MBC900).

44 **Fig. S3** Cyclic voltammetry (CV) characteristics of BC400 and BC400 modified by  
45 hydroquinone (MBC400) in the phosphate buffer solution (0.1M, 0.1M KCl, pH=7.0).

46 **Fig. S4** GC/MS chromatographs of PCP and its degradation products in the presence of  
47 different biochars.

48 **Fig. S5** Adsorption of PCP by different biochars.

49 **Fig. S6** Chemical transformation of PCP by different biochars in the cell-free NBAF culture  
50 mediums.

51 **Fig. S7** Time courses of the biomass of *Geobacter sulfurreducens* during PCP dechlorination  
52 in the absence or presence of biochars.

53 **Fig. S8** SEM images of *Geobacter sulfurreducens* growing on the surface of biochars during  
54 the reductive dechlorination of PCP.

55

56

57

58

59

60

61

62

63

64 Table S1. Physicochemical characteristics of biochars used in the present study

| Samples | Elemental analysis       |      |       |      |              |      | Electrical conductivity (S/cm) | Surface area (m <sup>2</sup> /g) | EAC <sup>a</sup> μmol e <sup>-</sup> /g biocar | EDC <sup>a</sup> μmol e <sup>-</sup> /g biocar |
|---------|--------------------------|------|-------|------|--------------|------|--------------------------------|----------------------------------|------------------------------------------------|------------------------------------------------|
|         | C                        | H    | O     | N    | O/C          | H/C  |                                |                                  |                                                |                                                |
|         | Percentage by weight (%) |      |       |      | Atomic ratio |      |                                |                                  |                                                |                                                |
| BC400   | 51.56                    | 2.49 | 26.40 | 0.79 | 0.38         | 0.58 | 3.38E-06                       | 5.46                             | 76.9±6.9                                       | 19.3±3.7                                       |
| BC500   | 53.06                    | 1.74 | 23.57 | 0.68 | 0.33         | 0.39 | 1.74E-05                       | 5.03                             | 85.4±9.4                                       | 27.2±2.8                                       |
| BC600   | 53.10                    | 1.39 | 24.34 | 0.62 | 0.34         | 0.31 | 0.011329                       | 5.41                             | 112.1±4.9                                      | 11.2±2.0                                       |
| BC700   | 52.51                    | 1.26 | 23.24 | 0.58 | 0.33         | 0.29 | 0.460                          | 8.95                             | 145.2±3.4                                      | 12.5±1.3                                       |
| BC800   | 48.32                    | 1.21 | 25.83 | 0.79 | 0.40         | 0.30 | 1.06                           | 11.56                            | 194.0±17.8                                     | 12.3±4.4                                       |
| BC900   | 46.90                    | 1.18 | 24.96 | 0.78 | 0.39         | 0.30 | 2.36                           | 10.85                            | 258.3±14.7                                     | 8.9±0.6                                        |

65 <sup>a</sup>The results of biochar EACs and EDCs were expressed as mean ± SD (n=3).

66

67

68

69

70

71

72

73

74

75

76

77

78

79

80

81 **Calculation of the maximum PCP degradation rate ( $k_{max}$ ).** The exponential decay equation  
 82 was used to compare the biodegradation of PCP in the presence of different biochars and can  
 83 be expressed as follows:

$$84 \quad C_t = A_0 \cdot \exp\left(-\frac{t}{D_0}\right) + B_0 \quad \text{Equation S1}$$

85 Where  $C_t$  is the concentration of PCP at different times,  $A_0$  is the decay intensity constant,  $D_0$   
 86 is the decay index, and  $B_0$  is a constant. The fitted parameters are summarized in Table S2.  
 87 The differential form of the equation (1) can be calculated as follows:

$$88 \quad \frac{dC_t}{dt} = -\frac{A_0}{D_0} \cdot \exp\left(-\frac{t}{D_0}\right) = -k_{max} \cdot \exp\left(-\frac{t}{D_0}\right) \quad \text{Equation S2}$$

89 Here  $k_{max}$  is obtained from the values of  $\frac{A_0}{D_0}$ , representing the observed maximum PCP  
 90 degradation rate ( $\left.\frac{dC_t}{dt}\right|_{t=0}$ ).

91 If Equation S1 and S2 are combined with the differential model equations in the text, the  
 92 relationship between  $k_{max}$  and the physiochemical properties of biochars (EC and EEC) can  
 93 be obtained and interpreted as follows:

$$94 \quad k_{max} = A_0 \cdot [k_0 \cdot X_s \cdot f + \alpha \cdot f \cdot [biochar]_{red} + \beta \cdot X \cdot \lambda \cdot (1-f)] \quad \text{Equation S3}$$

95

96 Table S2. The fitted parameters of PCP biodegradation in the presence of different biochars.

| Conditions | $A_0$   | $D_0$  | $B_0$   | $r$    | $p$                  |
|------------|---------|--------|---------|--------|----------------------|
| Control    | 2.2095  | 9.3110 | 17.8519 | 0.9874 | $3.0 \times 10^{-5}$ |
| BC400      | 4.1817  | 7.5998 | 15.9271 | 0.9903 | $1.5 \times 10^{-5}$ |
| BC500      | 5.8719  | 6.1312 | 14.1136 | 0.9947 | $1.8 \times 10^{-5}$ |
| BC600      | 10.4331 | 5.4201 | 9.2540  | 0.9973 | $2.7 \times 10^{-4}$ |
| BC700      | 11.6433 | 4.5025 | 7.7598  | 0.9967 | $1.4 \times 10^{-3}$ |
| BC800      | 12.3634 | 3.4892 | 7.2529  | 0.9939 | $8.6 \times 10^{-3}$ |
| BC900      | 17.9742 | 3.2103 | 3.5096  | 0.9971 | $1.6 \times 10^{-3}$ |

97

98

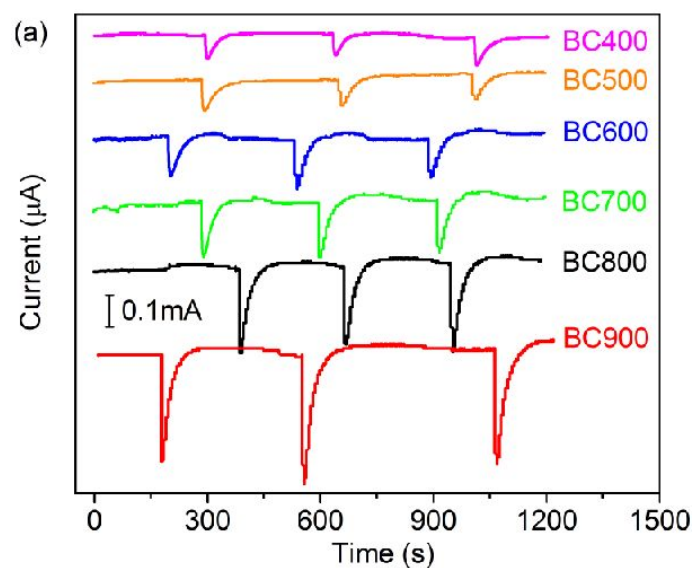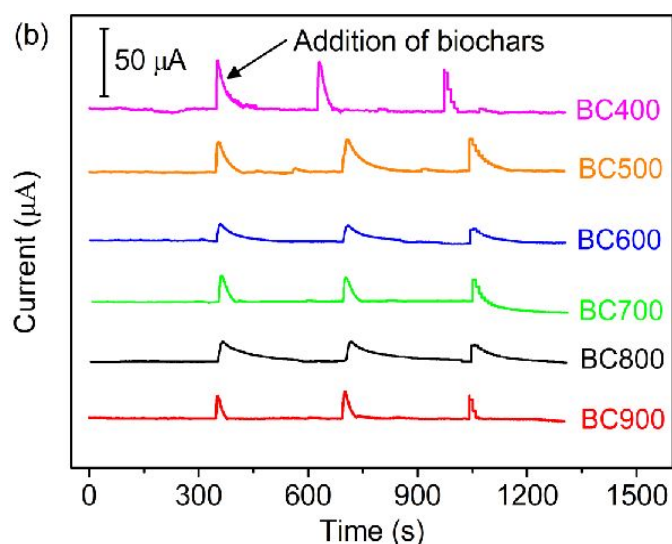

99

100

101 Fig. S1 Mediated electrochemical reduction (a, MER) and oxidization (b, MEO) of different  
 102 biochars by the graphite electrode at applied potentials. Each peaks in this figure represented  
 103 the responses of currents when a small amount of biochar suspensions (i.e., 1.0 mg of  
 104 biochars) were spiked into the electrochemical cell. The peak areas were used to calculate the  
 105 numbers of transferred electrons and EACs and EDCs of biochars.

106

107

108

109

110

111

112

113 **Modification of biochar surface quinone groups.** BC400 with the lowest EC was chemically  
114 modified by hydroquinone according to the method described by Perminova et al.<sup>1</sup>. Briefly,  
115 BC400 (1 g) was suspended in 50 mL of deionized water and its pH was adjusted to 7.0.  
116 Hydroquinone (0.5 g) was added to the suspension in the presence of a catalyzer (oxalic acid)  
117 and 1 g of 35% formaldehyde solution. The mixture was stirred and heated at 100 °C for 1 h.  
118 After cooling to room temperature, the product was centrifuged at 14,000 rpm for 15 min.  
119 The precipitate was washed with deionized water and centrifuged several times to avoid  
120 substrate sorption or residual. The modified biochar product (MBC400) was then freeze-dried  
121 and stored in a desiccator. Meanwhile, to introduce a model quinone compound to BC400  
122 particles by sorption, BC400 (5 g) was equilibrated with 2.0 mmols of  
123 anthraquinone-2,6-disulfonate (AQDS) in deionized water for 72 h. Then the mixture was  
124 filtrated and the precipitate (denoted as BC400-AQDS) was air-dried for 24 h.

125 Surface quinone groups of BC900 (with the highest EAC) were destroyed according to  
126 the method reported previously by Zhang et al.<sup>2</sup>. Specifically, biochar (1 g) with the highest  
127 EAC (BC900) was selected and pretreated with 100 mL of 30% H<sub>2</sub>O<sub>2</sub> solution for 48 h under  
128 stirring. Since biochar is a microporous material with large surface area, we prolonged the  
129 oxidation time from 15h to 48h. This will ensure that the oxidation reaction is thorough and  
130 decreases the content of quinone moieties of biochars as much as possible. The solution was  
131 then heated at 90 °C for 2 h and centrifuged at 14,000 rpm for 15 min. The precipitate  
132 (designated as MBC900) was washed several times with deionized water and freeze-dried.  
133 The biochar surface groups were characterized using Fourier-transform infrared spectroscopy  
134 (FTIR, Vector 33, Bruker Ltd., Germany).

135

136

137

138

139

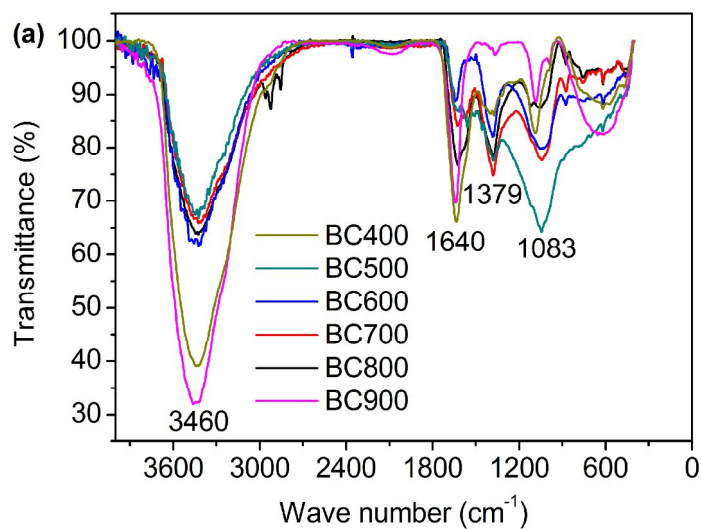

140

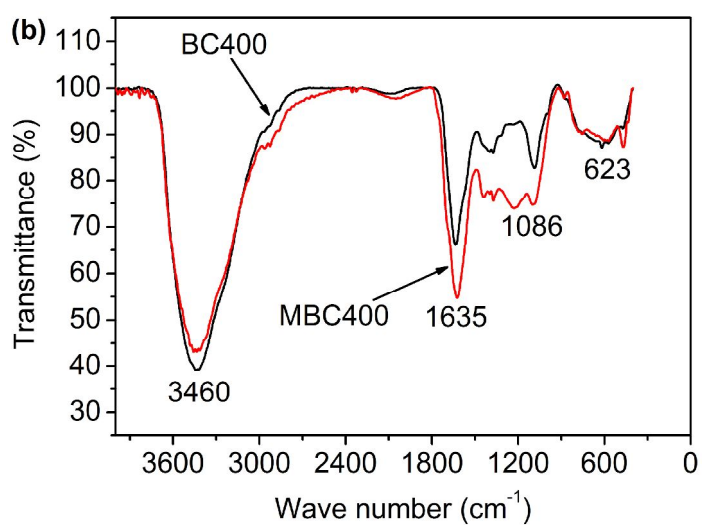

141

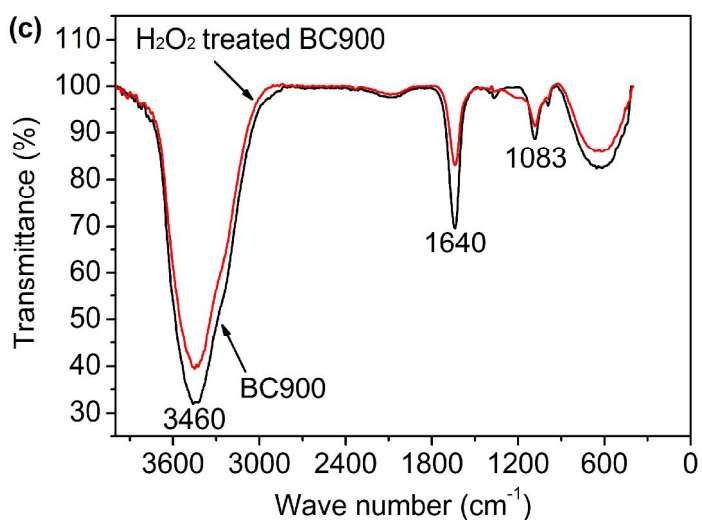

142

143 Fig. S2 Fourier Transform Infrared Spectrum of (a) six different biochars, (b) BC400 and  
 144 BC400 modified by hydroquinone (MBC400), (c) BC900 and H<sub>2</sub>O<sub>2</sub>-treated BC900  
 145 (MBC900).

146  
147  
148  
149  
150  
151  
152  
153  
154  
155  
156  
157  
158  
159  
160  
161  
162  
163  
164  
165  
166  
167  
168  
169  
170  
171  
172  
173

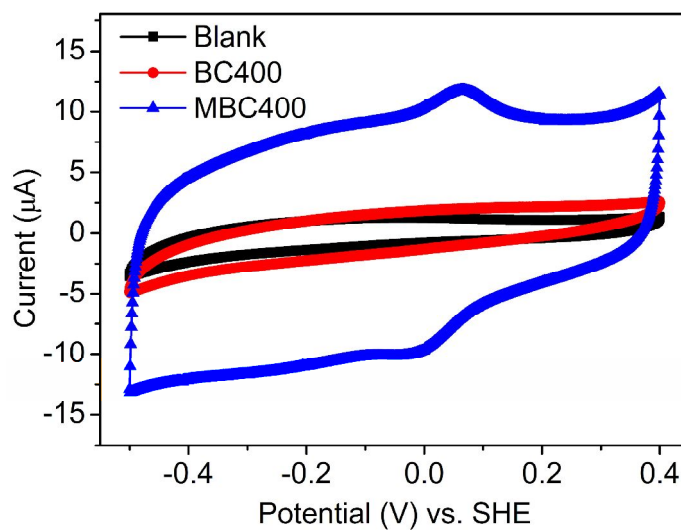

Fig. S3 Cyclic voltammetry (CV) characteristics of BC400 and BC400 modified by hydroquinone (MBC400) in the phosphate buffer solution (0.1M, 0.1M KCl, pH=7.0). The scan rate was 50 mV/s.



174 ***Procedures for extraction and quantification of PCP and its intermediate products.*** The  
175 adsorbed PCP in the biochar suspensions was extracted with ethanol (1:1, vol:vol) and the  
176 mixture was vibrated for 24 h in a vibrator at a rate of 200 rpm<sup>3-5</sup>. Then the samples were  
177 filtrated with a 0.22- $\mu$ m filter membrane to remove biochar particles and the PCP  
178 concentrations in the filtrate were determined by high-pressure liquid chromatography at a  
179 detection wavelength of 295 nm (HPLC, Waters Alliance 1525-2487 system with a symmetry  
180 C<sub>18</sub> column (5  $\mu$ m, 4.6 $\times$ 250 mm<sup>2</sup>, Waters, USA)), as previously described<sup>3</sup>. The mobile phase  
181 of HPLC was 1% (v/v) acetic acid in the methanol-water mixture (80:20, v/v) and the flow  
182 rate was 1 ml/min. All the concentrations of PCP reported were corrected from the dilution.

183 For GC/MS analysis, the intermediate products of PCP were acetylated with acetic  
184 anhydride in the presence of 0.1 M K<sub>2</sub>CO<sub>3</sub> (pH=10.5)<sup>3</sup>. Then the reaction mixtures were  
185 extracted with hexane for three times and dehydrated by anhydrous sodium sulfate. Afterward,  
186 the intermediate products in hexane were concentrated by rotary evaporation and nitrogen gas  
187 to constant volume of 1ml. 1 $\mu$ l of aliquot was injected to gas chromatography-mass  
188 spectrometry (GC-MS, Thermo Trace-DSQ-2000 with electron ionization and an Agilent  
189 capillary column (0.25 mm  $\times$  30 m  $\times$  0.25  $\mu$ m)). The protocols used for the determination of  
190 PCP and its intermediate products were as previously described by Tong et al.<sup>3</sup>.

191

192

193

194

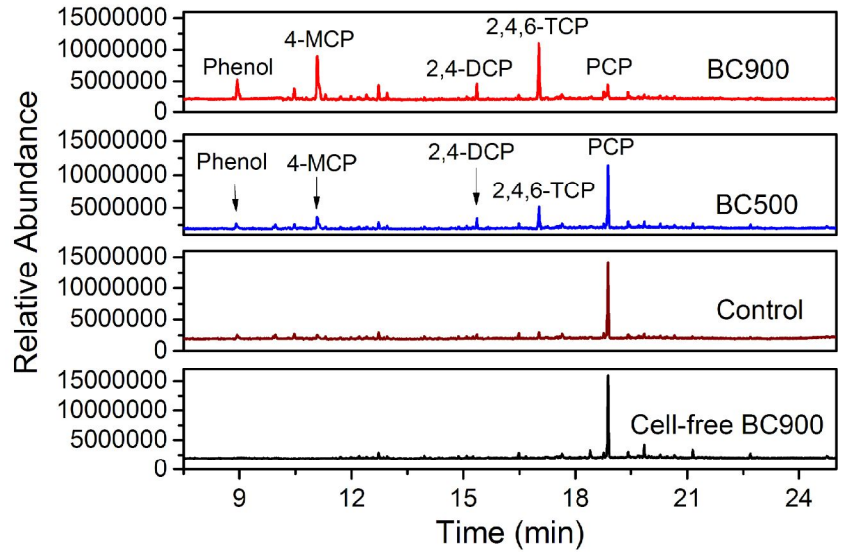

195

196 Fig. S4 GC/MS chromatographs of PCP intermediate products produced at 15 d under  
 197 different biochar conditions with *G. sulfurreducens* (BC900, BC500 and Control) or without  
 198 cells (cell-free BC900).

199

200

201

202

203

204

205

206

207

208

209

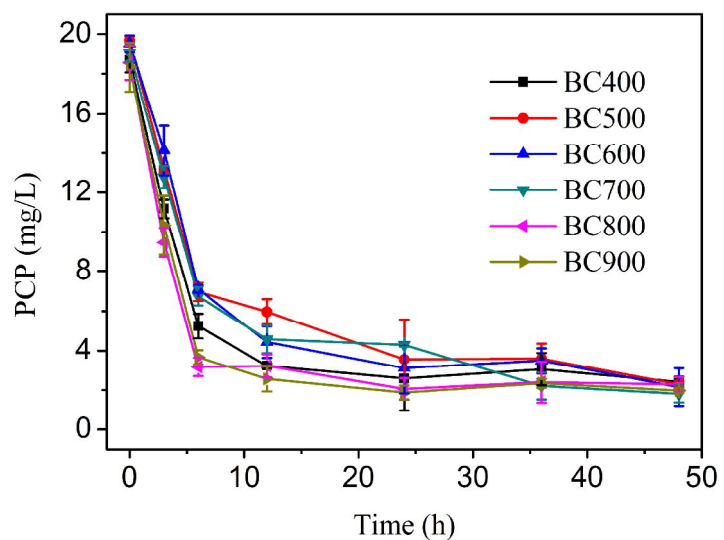

210

211

212 Fig. S5 Adsorption of PCP by different biochars. For this experiment, the concentrations of  
213 PCP in the aqueous phase (without extraction of the adsorbed PCP) in the presence of  
214 different biochars (2 g/L) were quantified by HPLC.

215

216

217

218

219

220

221

222

223

224

225

226

227

228

229

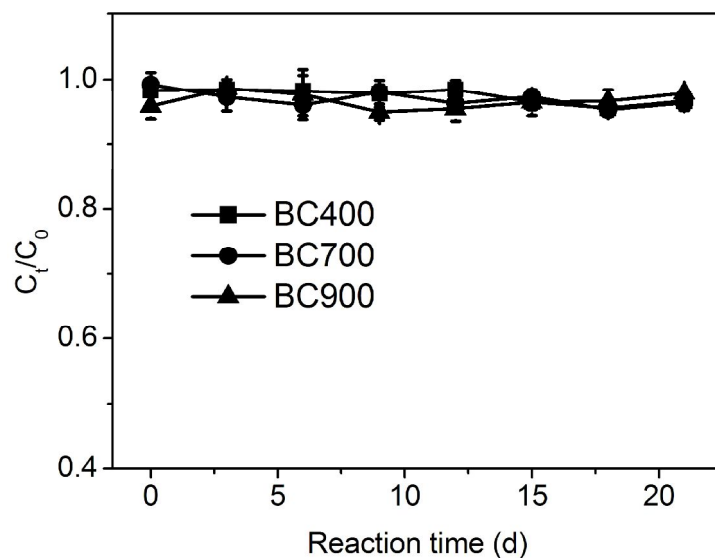

230

231 Fig. S6 Chemical transformation of PCP by different biochars in the cell-free NBAF culture  
 232 mediums. PCP (20 mg/L) was incubated anaerobically with different biochars (2g/L) at 30 °C  
 233 for 21 d. At different times, the adsorbed PCP in the samples were extracted with ethanol and  
 234 filtrated to remove biochars, followed by quantification using HPLC. Error bars represent  $\pm$   
 235 SD (n= 3). Since no PCP intermediate product was detected by GC/MS, the disappearance of  
 236 PCP (~3%) was probably due to the slight extraction loss caused adsorption by biochars.  
 237 Based on these data, the average PCP extraction efficiency at different times was  $97.5 \pm$   
 238  $1.26\%$ ,  $97.02 \pm 1.73\%$  and  $96.78 \pm 1.96\%$  for BC400, BC700 and BC900, respectively  
 239 (n=24).

240

241

242

243

244

245

246

247

248

249

250

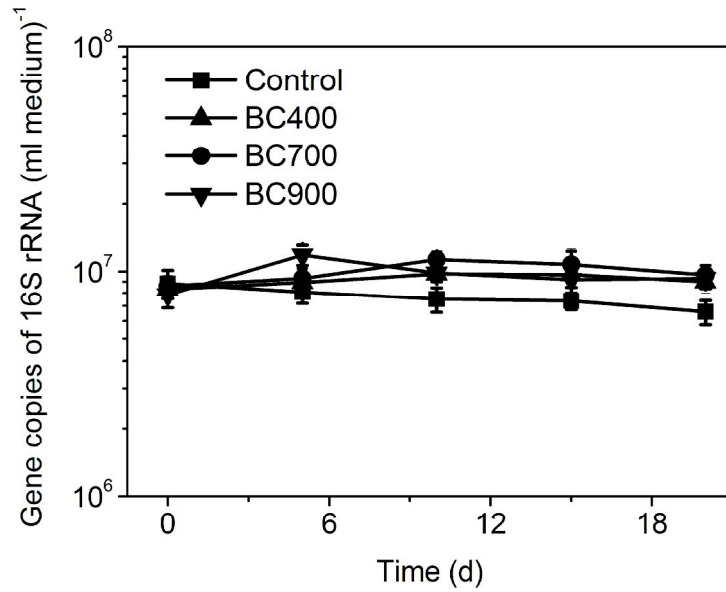

251

252 Fig. S7 Time courses of the biomass of *G. sulfurreducens* during PCP biodegradation in the  
 253 absence or presence of biochars. For this experiment, real-time fluorescent quantitative PCR  
 254 (qPCR) of the 16S rRNA gene numbers of *G. sulfurreducens* was performed to determine the  
 255 biomasses as previously described<sup>3,6</sup>.

256

257

258

259

260

261

262

263

264

265

266

267

268

269

270

271

272  
273  
274  
275  
276  
277  
278  
279  
280  
281  
282  
283  
284  
285  
286  
287  
288  
289  
290  
291  
292  
293  
294  
295  
296  
297  
298  
299  
300  
301

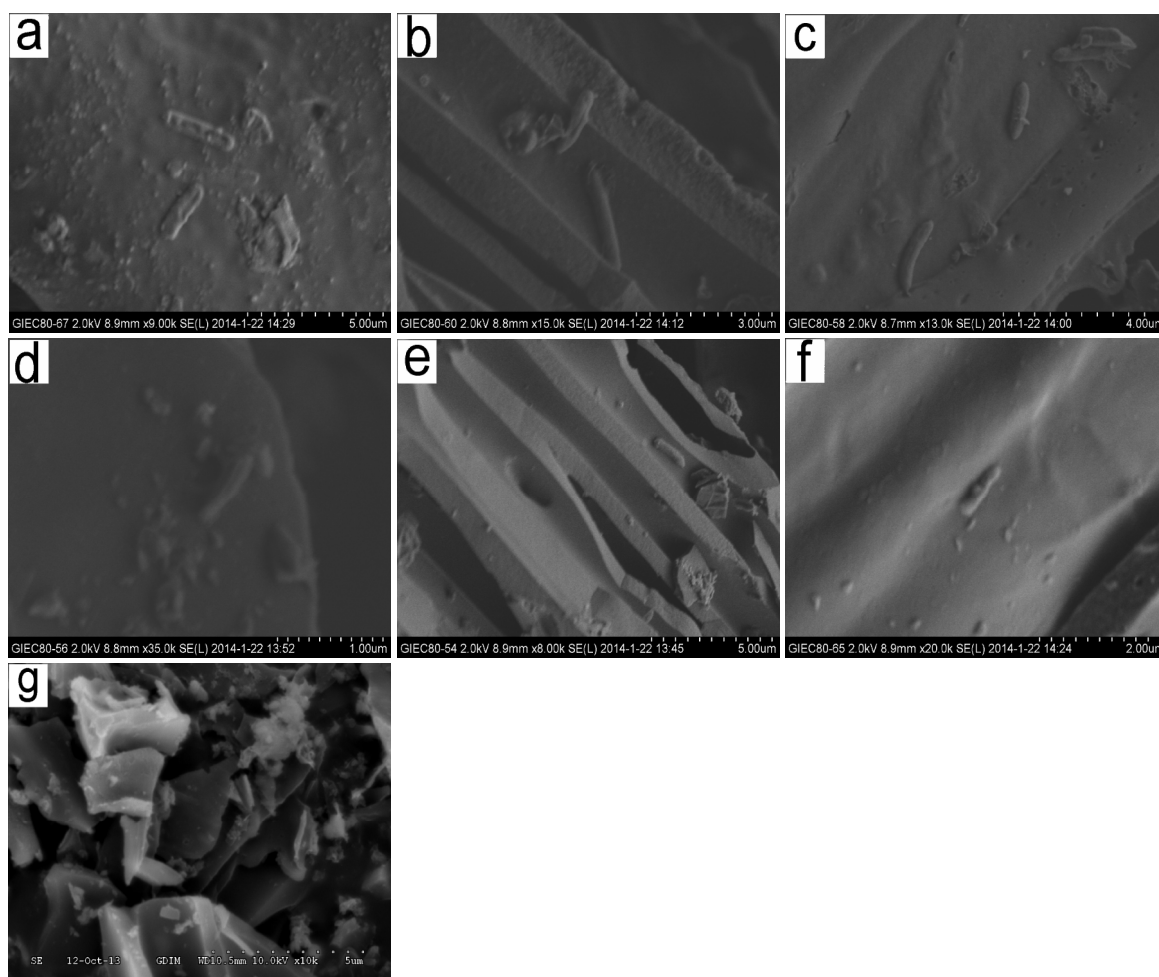

Fig. S8 SEM images of *Geobacter sulfurreducens* growing on the surface of biochars during the reductive biodegradation of PCP. At the end of PCP degradation kinetic experiments (21 d), biochars were harvested from the NBAF mediums by filtration at 0.45  $\mu\text{m}$  and then cells on the biochar particles were fixed with a 2.5% glutaraldehyde solution for 6 h, followed by a gradual dehydration using 25%, 50%, 75%, and 100% ethanol solutions, respectively. All the samples were freeze-dried and spray-coated with a thin film of platinum for SEM observation at 20kV. (a) BC400, (b) BC500, (c) BC600, (d) BC700, (e) BC800, (f) BC900, (g) sterile BC900.

302 **Reference**

- 303 1. Perminova, I. V. *et al.* Design of quinonoid-enriched humic materials with enhanced redox  
304 properties. *Environ. Sci. Technol.* **39**, 8518–8524 (2005).
- 305 2. Zhang, C. F. & Katayama, A. Humic as an electron mediator for microbial reductive  
306 dehalogenation. *Environ. Sci. Technol.* **46**, 6575–6583 (2012).
- 307 3. Tong, H., Hu, M., Li, F. B., Liu, C. S. & Chen, M. J. Biochar enhances the microbial and  
308 chemical transformation of pentachlorophenol in paddy soil. *Soil Biol. Biochem.* **70**, 142–150  
309 (2014).
- 310 4. Bryant, F. O., Hale, D. D. & Rogers, J. E. Regiospecific dechlorination of  
311 pentachlorophenol by dichlorophenol-adapted microorganisms in freshwater, anaerobic  
312 sediment slurries. *Appl. Environ. Microbiol.* **57**, 2293–2301 (1991).
- 313 5. Khodadoust, A. P., Suidan, M. T., Sorial, G. A. & Dionysiou, D. D. Desorption of  
314 pentachlorophenol from soils using mixed solvents. *Environ. Sci. Technol.* **33**, 4483–4491  
315 (1999).
- 316 6. Xu, J. L., Zhuang, L., Yang, G. Q., Yuan, Y. & Zhou, S. G. Extracellular quinones affecting  
317 methane production and methanogenic community in paddy soil. *Microb. Ecol.* **66**, 950–960  
318 (2013).
